# Supplementary material
Source: PubMed Central journal article supplement (PMC3457564)
Supplement: IAI.00683-12_zii999099818so2.pdf [file IAI.00683-12_zii999099818so2.pdf]

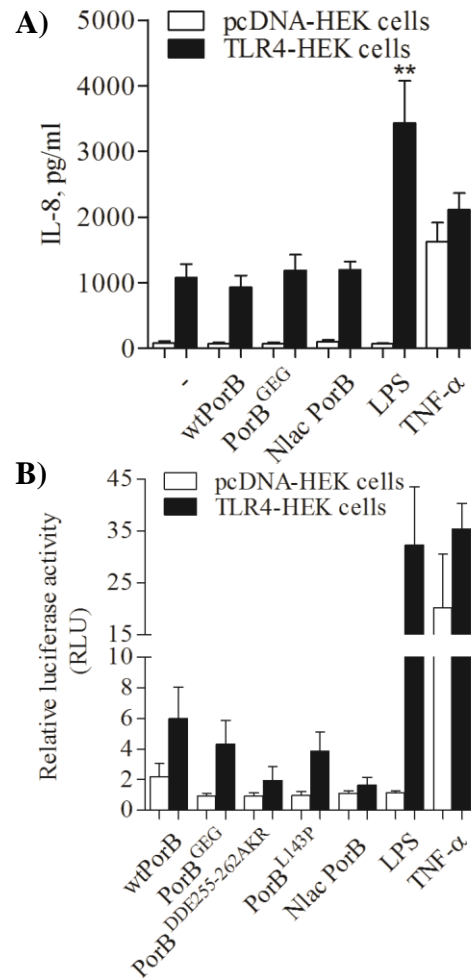

**Supplemental Figure 2: A)** TLR4-HEK cells (black bars) and pcDNA-HEK cells (white bars) were incubated with 10  $\mu$ g/ml of wtPorB, PorB<sup>GEG</sup> or Nlac PorB along with the TLR4 agonist *E. coli* LPS (100 ng/ml) for 18h. IL-8 secretion was measured by ELISA of cell supernatants and is expressed in pg/ml  $\pm$  st. error. \*\* p < 0.005 by unpaired t test, n = 6). **B)** TLR4-HEK cells and pcDNA-HEK cells as in were incubated as in A), NF- $\kappa$ B-dependent luciferase activity was measured and expressed as arbitrary units  $\pm$  st. error normalized to non-stimulated cells.
