# Supplementary material
Source: PubMed Central journal article supplement (PMC3457564)
Supplement: IAI.00683-12_zii999099818so3.pdf [file IAI.00683-12_zii999099818so3.pdf]

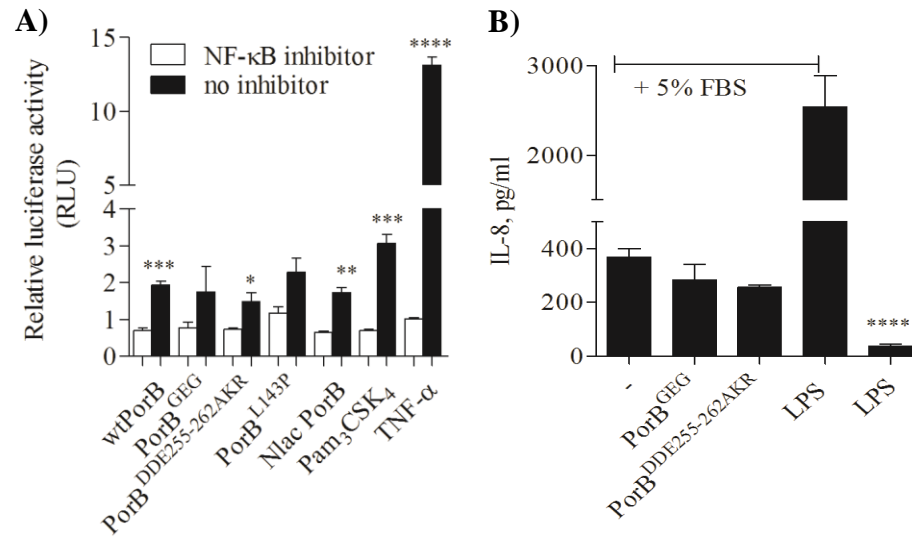

**Supplemental Figure 3: A)** Inhibition of NF- $\kappa$ B-dependent luciferase activity in TLR2-HEK cells. Black bars, cells stimulated for 18h with wtPorB, PorB loop mutants and *Nlac* PorB (all at 10  $\mu$ g/ml), Pam<sub>3</sub>CSK<sub>4</sub> (100 ng/ml) or TNF- $\alpha$  (20 ng/ml). White bars, cells stimulated as above following incubation with 25  $\mu$ M of NF- $\kappa$ B inhibitory ligand for 1h. Luciferase is expressed in arbitrary units  $\pm$  st. error relative to non-stimulated cells. \*\*\*  $p = 0.0005$ , \*\*  $p < 0.005$  and \*  $p = 0.03$  by unpaired t test,  $n = 3$ . **B)** BEAS-2B cells stimulation in the presence of 5% FBS-containing culture medium. Representative PorB loop mutants (10  $\mu$ g/ml), *E. coli* LPS (100 ng/ml). Secretion of IL-8 is measured by ELISA and expressed in pg/ml  $\pm$  st. error. For *E. coli* LPS, \*\*\*\*  $p < 0.0001$  by unpaired t test,  $n > 25$ ).
