# Supplementary material
Source: PubMed Central journal article supplement (PMC3457564)
Supplement: IAI.00683-12_zii999099818so4.pdf [file IAI.00683-12_zii999099818so4.pdf]

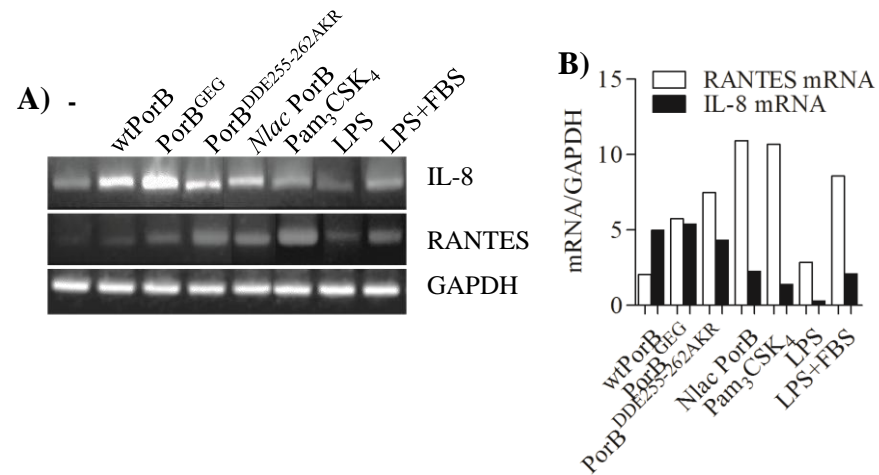

**Supplemental Figure 4:** **A)** RT-PCR of lysates from BEAS-2B cells stimulated for 18h with of wtPorB, PorB loop mutants and *Nlac* PorB (all at 10  $\mu$ g/ml), Pam<sub>3</sub>CSK<sub>4</sub> (100 ng/ml) and *E. coli* LPS (100 ng/ml, with/without 5% FBS). IL-8, RANTES and GAPDH mRNA levels visualized by agarose gel electrophoresis. **B)** Quantification of IL-8 and RANTES mRNA expression from A) normalized to that of GAPDH relative to control cells stimulated with medium alone.
