# Supplementary material
Source: PubMed Central journal article supplement (PMC3457564)
Supplement: IAI.00683-12_zii999099818so5.pdf [file IAI.00683-12_zii999099818so5.pdf]

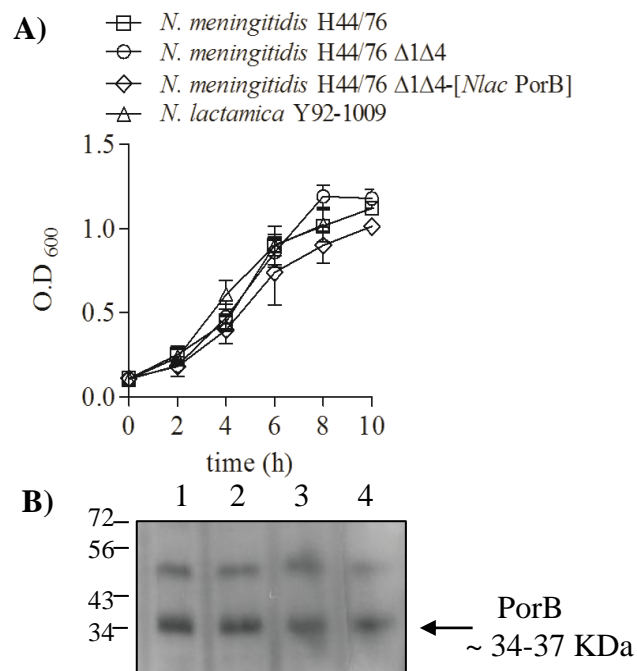

**Supplemental Figure 5: A)** Neisseria organisms growth in GC liquid medium monitored by optical density ( $OD_{600}$ ). Open squares, *N. meningitidis* H44/76 parent strain; open circle, *N. meningitidis* H44/76  $\Delta$ 1 $\Delta$ 4; open diamond, *N. meningitidis* H44/76  $\Delta$ 1 $\Delta$ 4-[*Nlac* PorB]; open triangle, *N. lactamica* Y92-1009. **B)** Expression levels of PorB from whole bacterial lysates (approx.  $1.6 \times 10^4$  CFU total per lane) detected by Western blot using a rabbit polyclonal anti-PorB antibody. Lane 1, *N. meningitidis* H44/76 parent strain; Lane 2, *N. meningitidis* H44/76  $\Delta$ 1 $\Delta$ 4; Lane 3, *N. lactamica* Y92-1009, Lane 4, *N. meningitidis* H44/76  $\Delta$ 1 $\Delta$ 4-[*Nlac* PorB];
