# Supplementary material
Source: PubMed Central journal article supplement (PMC3457564)
Supplement: IAI.00683-12_zii999099818so6.pdf [file IAI.00683-12_zii999099818so6.pdf]

**Supplemental Table 1: DNA primers.**

| <b>Primer name</b>                                              | <b>Primer Sequence (5' → 3')</b>                            |
|-----------------------------------------------------------------|-------------------------------------------------------------|
| <b>PorB Loop mutants</b>                                        |                                                             |
| Loop 4 <sup>L143P</sup> F                                       | GCGTACAATACGCGCCTAACGACAATGCAGGC                            |
| Loop 4 <sup>L143P</sup> R                                       | GCGTACAATACGCGCCTAACGACAATGCAGGC                            |
| Loop 5 <sup>177GEG178</sup> F                                   | CGGTGCCTATAAAAAGACATGGTGAAGGACATCAAGTGCAA<br>GAGGG          |
| Loop 5 <sup>177GEG178</sup> R                                   | CCCTCTTGCACTTGATGTCCTTCACCATGTCTTTTATAGGCA<br>CCG           |
| Loop 7 <sup>DDE255-262AKR</sup> F                               | GGCTTCAAAGGTTTGGTTGCTAAGGCAGACATAGGCAACCG<br>ATACGACCAAGTGG |
| Loop 7 <sup>DDE255-262AKR</sup> R                               | CCACTTGGTCGTATCGGTTGCCTATGTCTGCCTTAGCAACCA<br>AACCTTTGAAGCC |
| <b>Neisseria PorB exchange mutants</b>                          |                                                             |
| kan-ndeI-f1                                                     | GGGCATATGGAAAGCCACGTTGTGTCTCA                               |
| kan-ndeI-r1                                                     | TTGCATATGTGCTTTGCCACGGAACGGTC                               |
| PorMC58Down F SpeI                                              | GGCACTAGTTGGTATCAACAAAAAGCCTGTTCGC                          |
| PorMC58Down R SacI                                              | GGCGAGCTCAAGGCGCGAAGATTTACAGTT                              |
| nl_porF ApaI                                                    | TTGGGGCCCATGGCCGATGTTACCCTGTA                               |
| nl_porR SacII                                                   | GGGCCGCGGGACGACAGGCTTTTTGTTGATAC                            |
| NLporloop1_F                                                    | CCTACCGTACTGTAAAACACACAG                                    |
| NLporloop7_R                                                    | TCGCCGTCTGCTTTAGCAACAGTG                                    |
| *Restriction sites indicated in the primer name are underlined. |                                                             |
| <b>Cytokines</b>                                                |                                                             |
| IL-8 F                                                          | CATGACTTCCAAGCTGGCCGTG                                      |
| IL-8 R                                                          | TCACTGATTCTTCGATACCACAGAG                                   |
| RANTES F                                                        | ATGAAGGTCTCCGCGGCACGC CTCGCTGTC                             |
| RANTES R                                                        | TAGTTGAGAAACCTCTACTCGATC                                    |
| GAPDH F                                                         | TCCATGAC AACTTTGGTATCGTG                                    |
| GAPDH R                                                         | TGTCGTGTTGAAGTCAGAGGA                                       |
