# Supplementary material
Source: PubMed Central journal article supplement (PMC3457564)
Supplement: IAI.00683-12_zii999099818so7.pdf [file IAI.00683-12_zii999099818so7.pdf]

**Supplemental Table 2. Summary of PorB loop mutations**

| <b>Location</b> | <b>Position</b> | <b>Residues</b>                                                   | <b>Mutant</b>                      |
|-----------------|-----------------|-------------------------------------------------------------------|------------------------------------|
| Loop 4          | 143             | <i>Nlac</i> PorB: Pro<br><i>Nme</i> PorB: Leu                     | PorB <sup>L143P</sup>              |
| Loop 5          | 177-178         | <i>Nlac</i> PorB: Gly,Glu,Gly<br><i>Nme</i> PorB: – – –           | PorB <sup>GEG</sup>                |
| Loop 7          | 255-256<br>262  | <i>Nlac</i> PorB: Ala, Lys, Arg<br><i>Nme</i> PorB: Asp, Asp, Glu | PorB <sup>DDE255-<br/>262AKR</sup> |
